# Supplementary material
Source: PubMed Central journal article supplement (PMC4813472)
Supplement: 10.1074_M115.671057_jbc.M115.671057-1.pdf [file 10.1074_M115.671057_jbc.M115.671057-1.pdf]

## Supplemental Table 1

Yeast strains used in this study.

|                           | Genotype                                                                                                                         | Source                       |
|---------------------------|----------------------------------------------------------------------------------------------------------------------------------|------------------------------|
| W9100-12C<br>[W303 RAD5+] | MAT alpha <i>ADE2 leu2-3,112 his3-11,15 ura3-1 trp1-1 LYS2 RAD5</i>                                                              | (1,2)                        |
| KBY673-3B                 | MAT $\alpha$ <i>ubp7::natNT2 ADE2 leu2-3,112 his3-11,15 ura3-1 trp1-1 lys2<math>\Delta</math> RAD5</i>                           | This study                   |
| KBY673-9A                 | MAT a <i>ubp7::natNT2 ADE2 leu2-3,112 his3-11,15 ura3-1 trp1-1 lys2<math>\Delta</math> RAD5</i>                                  | This study                   |
| KBY218-3C                 | MAT a <i>rad51::natNT2 ADE2 leu2-3,112 his3-11,15 ura3-1 trp1-1 lys2<math>\Delta</math> RAD5</i>                                 | S. Godin<br><i>submitted</i> |
| KBY784-9B                 | MAT a <i>rad4::hphNT1 ADE2 leu2-3,112 his3-11,15 ura3-1 TRP1 lys2<math>\Delta</math> RAD5</i>                                    | This study                   |
| KBY830-2A                 | MAT a <i>ubp7::natNT2 rad4::hph-NT1 ADE2 leu2-3,112 his3-11,15 ura3-1 TRP1 lys2<math>\Delta</math> RAD5</i>                      | This study                   |
| KBY880-4C                 | MAT a <i>rad7::natNT2 ADE2 leu2-3,112 his3-11,15 ura3-1 trp1-1 lys2<math>\Delta</math> RAD5</i>                                  | This study                   |
| KBY895-8D                 | Mat a <i>rad7::natNT2 ubp7::natNT2 ADE2 leu2-3,112 his3-11,15 ura3-1 trp1-1 LYS2 RAD5</i>                                        | This study                   |
| KBY949-1B                 | Mat a <i>ADE2 leu2<math>\Delta</math>EcoRI::URA3-HO::leu2<math>\Delta</math>BstEII his3-11 lys2<math>\Delta</math> RAD5</i>      | This study                   |
| KBY950-12B                | Mat alpha <i>ubp7::natNT2 ADE2 leu2<math>\Delta</math>EcoRI::URA3-HO::leu2<math>\Delta</math>BstEII his3-11 LYS2 trp1-1 RAD5</i> | This study                   |
| KBY987-10A                | MAT alpha <i>CAN1 ADE2 leu2-3,112 his3-11,15 ura3-1 trp1-1 LYS2 RAD5</i>                                                         | This study                   |
| KBY987-4B                 | MAT a <i>CAN1 ubp7::natNT2 ADE2 leu2-3,112 his3-11,15 ura3-1 trp1-1 LYS2 RAD5</i>                                                | This study                   |
| KBY987-5C                 | MAT alpha <i>CAN1 rad51::natNT2 ADE2 leu2-3,112 his3-11,15 ura3-1 trp1-1 LYS2 RAD5</i>                                           | This study                   |
| KBY987-10D                | MAT alpha <i>CAN1 rad51::natNT2 ubp7::natNT2 ADE2 leu2-3,112 his3-11,15 ura3-1 trp1-1 LYS2 RAD5</i>                              | This study                   |
| KBY825-4B                 | MAT a <i>rad51::natNT2 ubp7::natNT2 ADE2 leu2-3,112 his3-11,15 ura3-1 trp1-1 lys2<math>\Delta</math> RAD5</i>                    | This study                   |
| KBY51-3B                  | MAT a <i>sgs1::HIS3 ADE2 leu2-3,112 his3-11,15 ura3-1 trp1-1 LYS2 RAD5</i>                                                       | This study                   |
| KBY826-21A                | MAT a <i>ubp7::natNT2 sgs1::HIS3 ADE2 leu2-3,112 his3-11,15 ura3-1 trp1-1 LYS2 RAD5</i>                                          | This study                   |
| KBY1024-1D                | MAT a <i>mus81::KanMX4 ADE2 leu2-3,112 his3-11,15 ura3-1 trp1-1 lys2<math>\Delta</math> RAD5</i>                                 | This study                   |
| KBY1024-8C                | MAT a <i>ubp7::natNT2 mus81::KanMX4 ADE2 leu2-3,112 his3-11,15 ura3-1 trp1-1 lys2<math>\Delta</math> RAD5</i>                    | This study                   |
| W8196-6A                  | MAT a <i>RFA1-YFP RAD52-CFP ADE2 leu2-3,112 his3-11,15 ura3-1 trp1-1 LYS2 RAD5</i>                                               | R. Rothstein                 |
| KBY776-4A                 | MAT a <i>ubp7::natNT2 RFA1-YFP RAD52-CFP ADE2 leu2-3,112 his3-11,15 ura3-1 trp1-1 LYS2 RAD5</i>                                  | This study                   |
| KBY891-13C                | MAT alpha <i>rad17::KanMX ADE2 leu2-3,112 his3-11,15 ura3-1 trp1-1 lys2<math>\Delta</math> RAD5</i>                              | This study                   |
| KBY891-3A                 | MAT a <i>rad17::KanMX ubp7::natNT2 ADE2 leu2-3,112 his3-</i>                                                                     | This study                   |

|            |                                                                                                  |                              |
|------------|--------------------------------------------------------------------------------------------------|------------------------------|
|            | <i>11,15 ura3-1 trp1-1 LYS2 RAD5</i>                                                             |                              |
| KBY726-2D  | MAT alpha <i>mrc1::KanMX4 ADE2 leu2-3,112 his3-11,15 ura3-1 trp1-1 lys2Δ RAD5</i>                | S. Godin<br><i>submitted</i> |
| KBY986-1D  | MAT a <i>ubp7::natNT2 mrc1::KanMX4 ADE2 leu2-3,112 his3-11,15 ura3-1 trp1-1 lys2Δ RAD5</i>       | This study                   |
| KBY725-4A  | MAT a <i>rad9::HIS3MX6 ADE2 leu2-3,112 his3-11,15 ura3-1 trp1-1 LYS2 RAD5</i>                    | S. Godin<br><i>submitted</i> |
| KBY985-3B  | MAT a <i>ubp7::natNT2 rad9::HIS3MX6 ADE2 leu2-3,112 his3-11,15 ura3-1 trp1-1 LYS2 RAD5</i>       | This study                   |
| KBY990-8A  | MAT a <i>MRC1-9myc::HIS3MX6 ADE2 leu2-3,112 his3-11,15 ura3-1 trp1-1 LYS2 RAD5</i>               | This study                   |
| KBY990-4A  | MAT a <i>ubp7::natNT2 MRC1-9myc::HIS3MX6 ADE2 leu2-3,112 his3-11,15 ura3-1 trp1-1 lys2Δ RAD5</i> | This study                   |
| W9197-7A   | MAT a <i>rad6::KanMX TRP1 ADE2 leu2-3,112 his3-11,15 ura3-1 trp1-1 LYS2 RAD5</i>                 | R. Rothstein                 |
| KBY964-6A  | Mat a <i>ubp7::NAT rad6::KanMX ADE2 leu2-3,112 his3-11,15 ura3-1 trp1-1 lys2Δ RAD5</i>           | This study                   |
| W9152-2D   | MAT alpha <i>asf1::KanMX ADE2 leu2-3,112 his3-11,15 ura3-1 trp1Δ lys2Δ RAD5</i>                  | R. Rothstein                 |
| KBY980-14A | MAT a <i>ubp7::natNT2 asf1::KanMX ADE2 leu2-3,112 his3-11,15 ura3-1 trp1 lys2Δ RAD5</i>          | This study                   |
| KBY912-1   | MAT alpha <i>UBP7-3HA::hph-NT1 ADE2 leu2-3,112 his3-11,15 ura3-1 trp1-1 LYS2 RAD5</i>            | This study                   |
| KY1023*    | MAT a <i>his3del200 trp1del63</i>                                                                | K. Arndt                     |
| KBY983-1*  | MAT a <i>ubp7::hph-NT1 his3del200 trp1del63</i>                                                  | This study                   |
| KY2167*    | MAT alpha <i>HTA1-htb1-K123R (hta2-htb2)del::KanMX ura3del0</i>                                  | K. Arndt, (3)                |
| KBY984-7B* | MAT a <i>ubp7::hph-NT1 HTA1-htb1-K123R (hta2-htb2) del::KanMX ura3del0</i>                       | This study                   |
| KBY254-2C  | MAT a <i>ADE2 leu2-3,112 his3-11,15 ura3-1 trp1-1 lys2Δ RAD5</i>                                 | This study                   |

All strains are isogenic to W303 with exception of those denoted with \*, which are derivatives of FY2 (4). Strain construction of KY2167 is essentially described in (3).

## References

1. Thomas, B. J., and Rothstein, R. (1989) Elevated recombination rates in transcriptionally active DNA. *Cell* **56**, 619-630
2. Zhao, X., Muller, E. G., and Rothstein, R. (1998) A suppressor of two essential checkpoint genes identifies a novel protein that negatively affects dNTP pools. *Mol. Cell* **2**, 329-340
3. Tomson, B. N., Davis, C. P., Warner, M. H., and Arndt, K. M. (2011) Identification of a role for histone H2B ubiquitylation in noncoding RNA 3'-end formation through mutational analysis of Rtf1 in *Saccharomyces cerevisiae*. *Genetics* **188**, 273-289
4. Winston, F., Dollard, C., and Ricupero-Hovasse, S. L. (1995) Construction of a set of convenient *Saccharomyces cerevisiae* strains that are isogenic to S288C. *Yeast* **11**, 53-55
